# Supplementary material for: Busting the myth of spontaneous formation of H 2 O 2 at the air–water interface: contributions of the liquid–solid interface and dissolved oxygen exposed
Source: Royal Society of Chemistry journal article supplement (doi:10.1039/d3sc06534k), 2024-01-01
Supplement: d3sc06534k2.pdf [file d3sc06534k2.pdf]

## **Supplementary Information**

### **Busting the Myth of Spontaneous Formation of H<sub>2</sub>O<sub>2</sub> at the Air–Water Interface: Contributions of the Liquid–Solid Interface and Dissolved Oxygen Exposed**

Muzzamil Ahmad Eatoo & Himanshu Mishra\*

Environmental Science and Engineering (EnSE) Program,  
Biological and Environmental Science and Engineering (BESE) Division,  
King Abdullah University of Science and Technology (KAUST),  
Thuwal, 23955-6900, Kingdom of Saudi Arabia

Water Desalination and Reuse Center (WDRC),  
King Abdullah University of Science and Technology (KAUST), Thuwal, 23955-6900,  
Kingdom of Saudi Arabia

Center for Desert Agriculture (CDA),  
King Abdullah University of Science and Technology (KAUST), Thuwal, 23955-6900,  
Kingdom of Saudi Arabia

\*[Himanshu.Mishra@kaust.edu.sa](mailto:Himanshu.Mishra@kaust.edu.sa)

## Section S1: Experimental setup

### Water microdroplet generation via sprays

We adapted the experimental setup built by Gallo et al.<sup>1</sup> to produce water microdroplets. In a coaxial system, water was injected through an inner tube with a 100- $\mu\text{m}$  diameter using a syringe pump (PHD Ultra, Harvard Apparatus). Dry  $\text{N}_2(\text{g})$  was pushed through the outer tube with a 430- $\mu\text{m}$  diameter. Additionally, HPLC-grade water was used, and a glass cell (equipped with a tiny opening to prevent pressure build-up) was employed to collect microdroplets while minimizing ambient contamination. The water flow rate was set to 25  $\mu\text{L}/\text{min}$ , whereas the gas ( $\text{N}_2$  or  $\text{O}_2$ ) pressure was 100 psi.

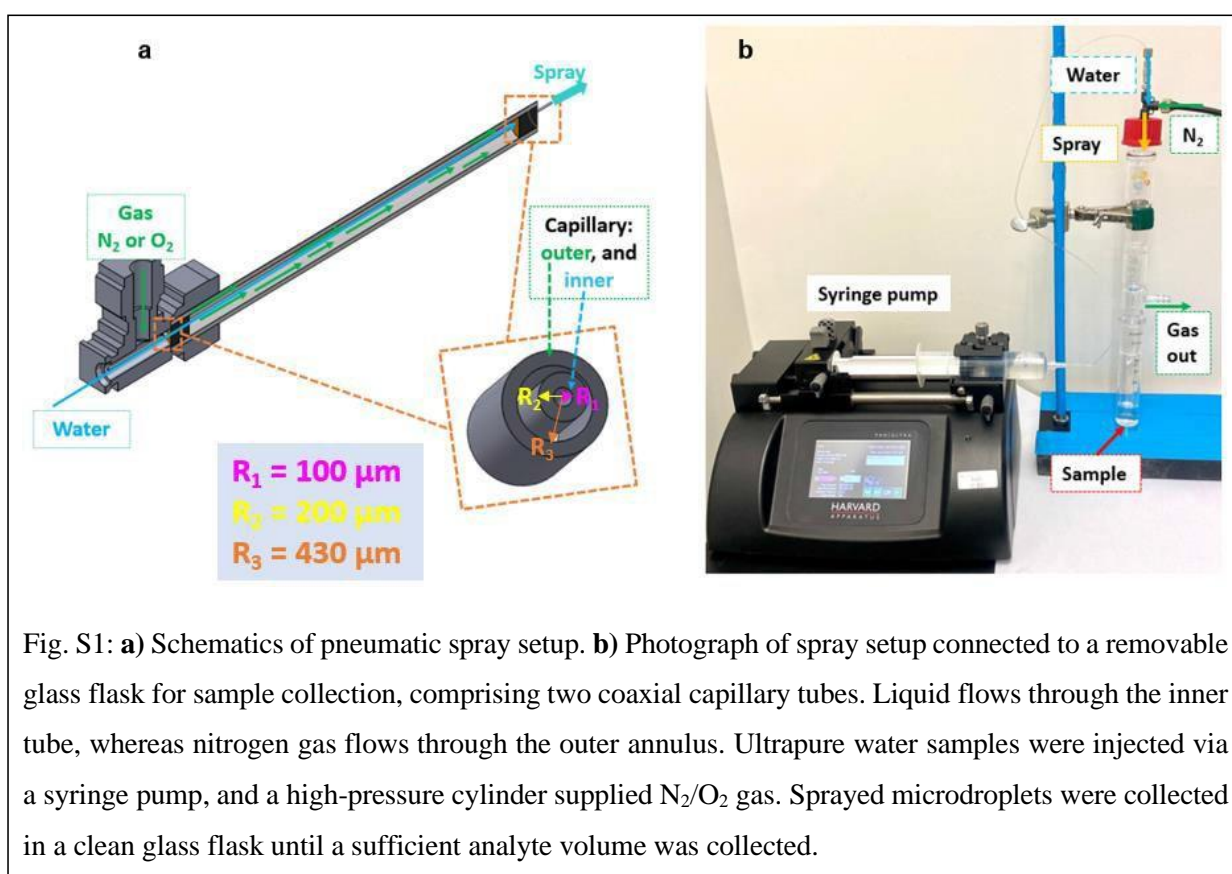

Fig. S1: **a)** Schematics of pneumatic spray setup. **b)** Photograph of spray setup connected to a removable glass flask for sample collection, comprising two coaxial capillary tubes. Liquid flows through the inner tube, whereas nitrogen gas flows through the outer annulus. Ultrapure water samples were injected via a syringe pump, and a high-pressure cylinder supplied  $\text{N}_2/\text{O}_2$  gas. Sprayed microdroplets were collected in a clean glass flask until a sufficient analyte volume was collected.

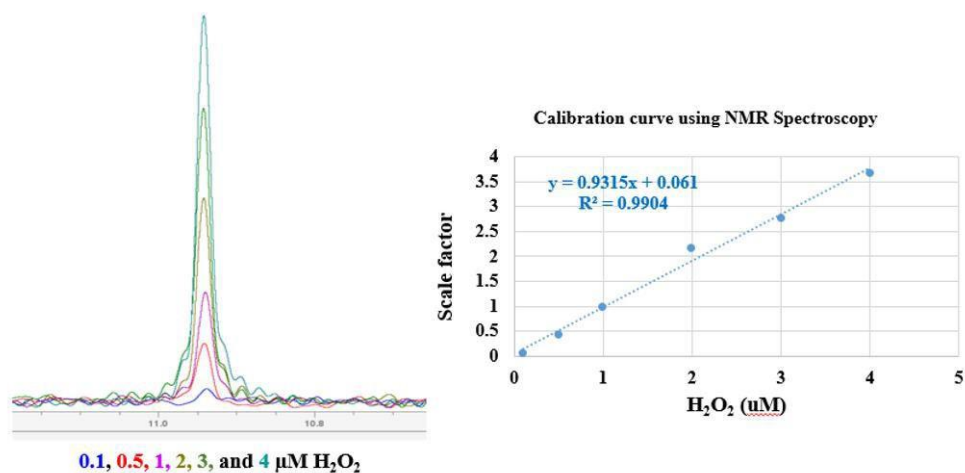

**Fig. S2:** Quantification of  $\text{H}_2\text{O}_2$  by  $^1\text{H}$ -NMR spectroscopy. Standard samples of known  $\text{H}_2\text{O}_2(\text{aq})$  concentrations were prepared by diluting a concentrated 30% (v/v) stock solution using HPLC-grade deionized water. All  $^1\text{H}$ -NMR experiments were conducted at  $2^\circ\text{C}$ . TopSpin 4.2.0 software processed the data.

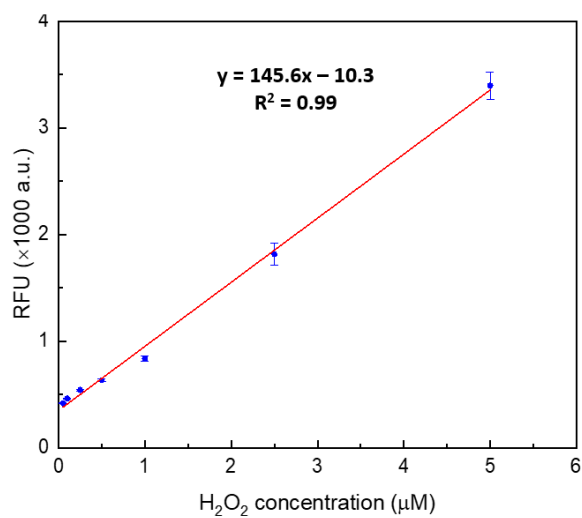

**Fig. S3:** Representative calibration curve for  $\text{H}_2\text{O}_2$  measurement using the hydrogen peroxide assay kit (HPAK).

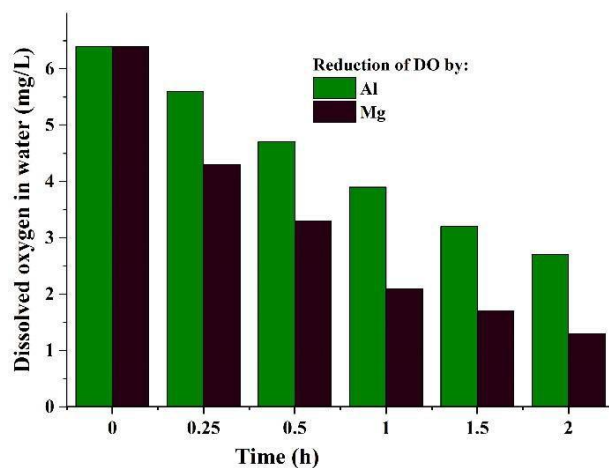

Fig. S4. Reduction of dissolved oxygen ( $O_2$ ) concentration in water during  $H_2O_2$  formation at the water–solid interface. In a typical experiment, an Al or Mg pellet was immersed in 5 mL of water in a closed vial. The dissolved  $O_2$  concentration was measured over time using a probe (WTW Multi 3320 device) with a detection limit of 0.01 mg/L. The results revealed that the dissolved  $O_2$  concentration reduced over time as  $H_2O_2$  formed. Moreover, the reduction was faster with the Mg than with the Al pellet in accordance with their ability to produce  $H_2O_2(aq)$ .

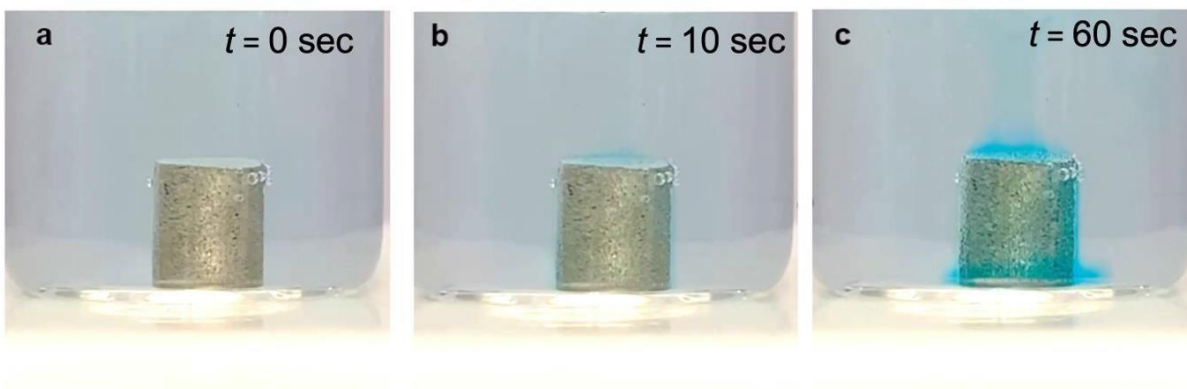

Fig. S5. An Mg pellet is immersed in a 1:1 mixture of water and HPAK, producing  $\text{H}_2\text{O}_2(\text{aq})$  evidenced by the blue fluorescence over time, proving that this chemical transformation does not depend on the air–water interface, “microscale” water droplets, or ultrahigh (instantaneous) electrical fields.

**Table S1:** H<sub>2</sub>O<sub>2</sub> formation in bulk water as characterized by NMR spectroscopy

| <b>Solid–water system</b><br><b>Water obtained from the Milli-Q system</b> |                                                                                                                             | <b>Measured H<sub>2</sub>O<sub>2</sub>(aq)</b><br><b>concentration after 1 min</b><br>(NMR spectroscopy) |
|----------------------------------------------------------------------------|-----------------------------------------------------------------------------------------------------------------------------|----------------------------------------------------------------------------------------------------------|
| 1                                                                          | 1 mL sessile water droplet placed on a freshly polished Al plate (see Supplementary Movie S1)                               | $1.4 \pm 0.5 \mu\text{M}$                                                                                |
| 2                                                                          | 1 mL water film between two freshly polished Al plates of size 200× 200 mm                                                  | $39 \pm 6 \mu\text{M}$                                                                                   |
| 3                                                                          | A cylindrical Mg pellet with a diameter of 1 cm and height of 1.5 cm (6.2 cm <sup>2</sup> ) fully immersed in 5 mL of water | $2.5 \pm 0.6 \mu\text{M}$                                                                                |

## References

1. A. Gallo Jr, N. H. Musskopf, X. Liu, Z. Yang, J. Petry, P. Zhang, S. Thoroddsen, H. Im and H. Mishra, On the formation of hydrogen peroxide in water microdroplets, *Chemical Science*, 2022, **13**, 2574-2583.
